# Supplementary material for: A rational design of the coupling mechanism of physical adsorption and chemical charge effect for high-performance lithium–sulfur batteries
Source: Royal Society of Chemistry journal article supplement (doi:10.1039/c9ra01730e), 2019-01-01
Supplement: c9ra01730e1.pdf [file c9ra01730e1.pdf]

**Rationally designing coupling mechanism of physical  
adsorption and chemical charge effect for high performance  
Lithium sulfur batteries**

Guilin Feng<sup>a</sup>, Xiaohong Liu<sup>a</sup>, Yasai Wang<sup>a</sup>, Zhenguo Wu<sup>a</sup>, Chen Wu<sup>a</sup>, Rong Li<sup>a</sup>,  
Yanxiao Chen<sup>a,\*</sup>, Xiaodong Guo<sup>a</sup>, Benhe Zhong<sup>a</sup>, Jianshu Li<sup>b</sup>

*<sup>a</sup>School of Chemical Engineering, Sichuan University, Chengdu 610065, P. R. China.*

*<sup>b</sup>College of Polymer Science and Engineering, State Key Laboratory of Polymer Materials  
Engineering, Sichuan University, Chengdu 610065, People's Republic of China.*

Corresponding Authors:

Tel: +86-28-85406702; Fax: +86-28-85406702;

E-mail address:

yxchen888@163.com

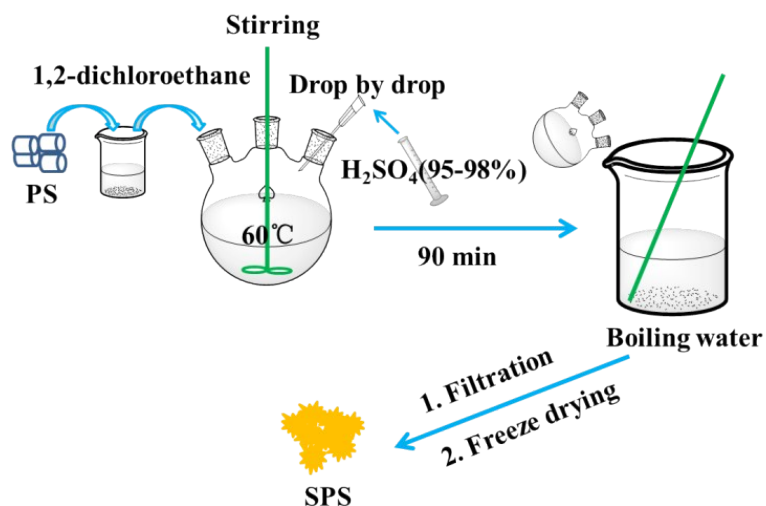

Fig.S1 The diagrammatic drawing of prepared SPS.

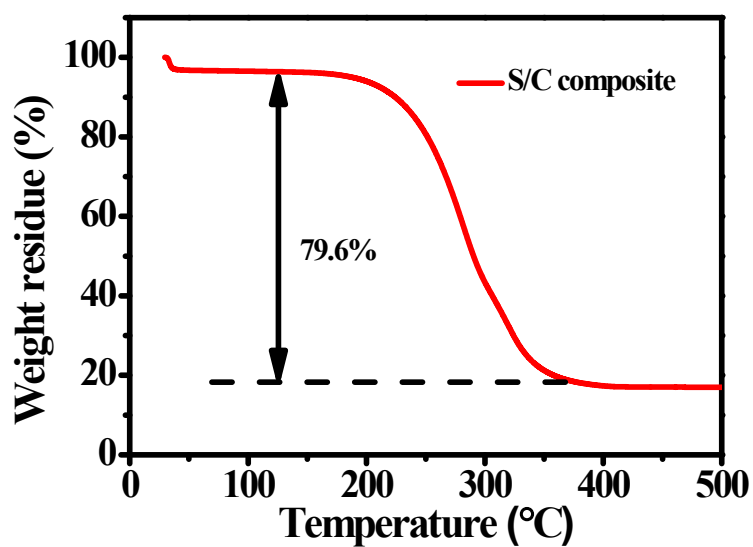

Fig.S2 TGA curve of S/C composite under Argon atmosphere

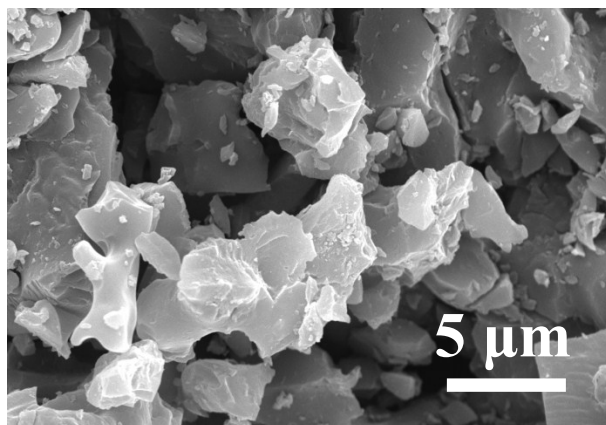

Fig.S3 SEM image of prepared NACC.

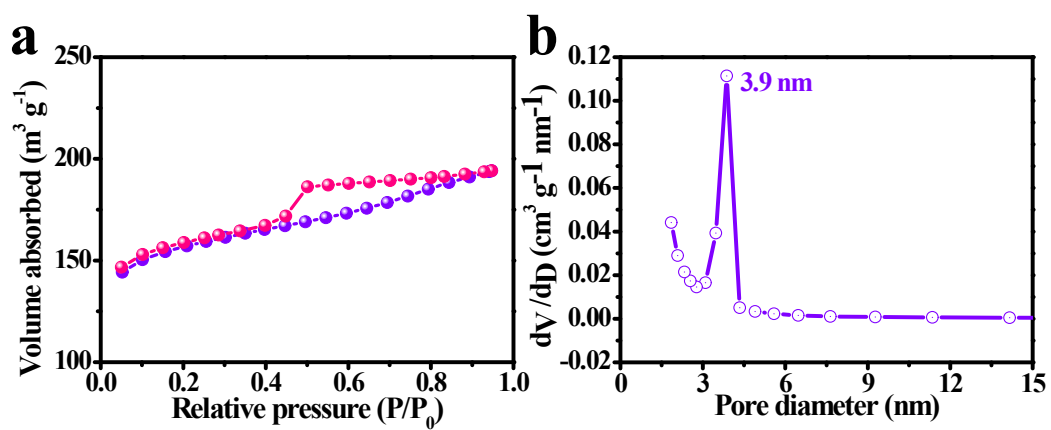

Fig.S4. (a) Nitrogen adsorption–desorption isotherms for prepared NACC, (b)

BJH pore size distribution profiles.

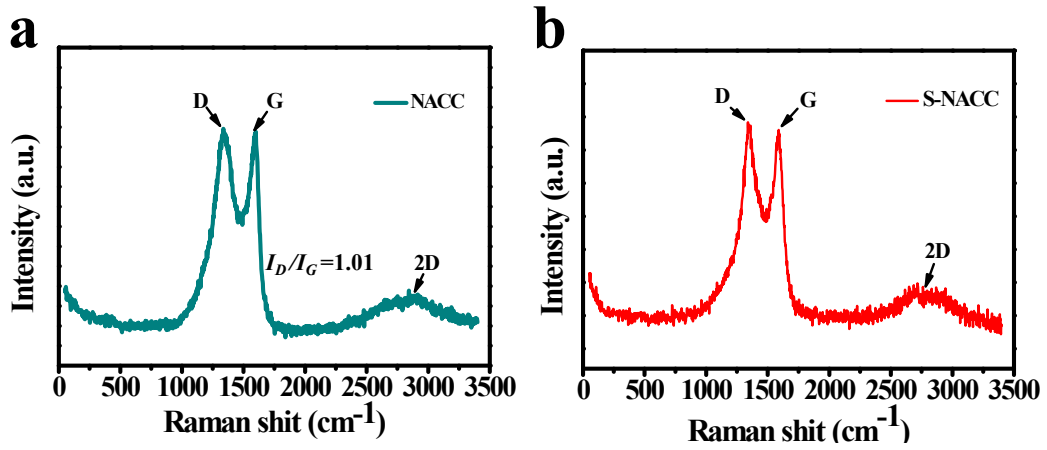

Fig.S5 The Raman spectra of (a) NACC, (b) S-NACC coated separator

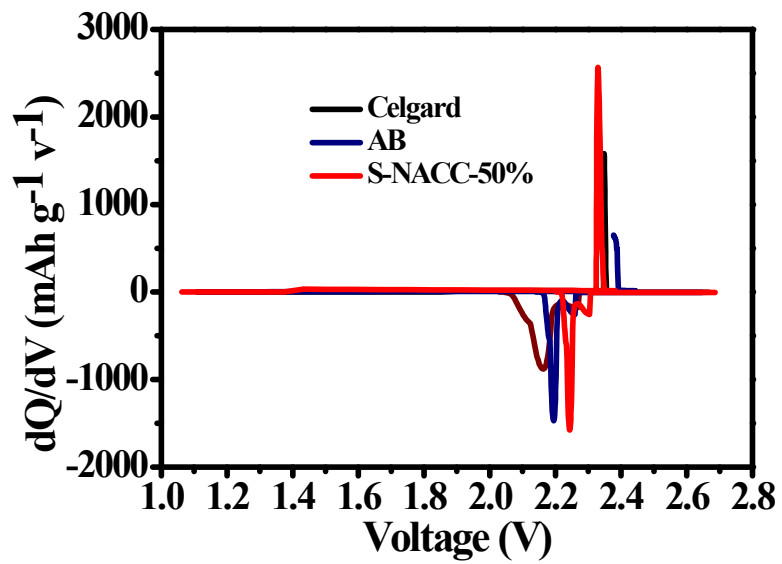

Fig.S6 The  $dQ/dV$  result of three different separators.

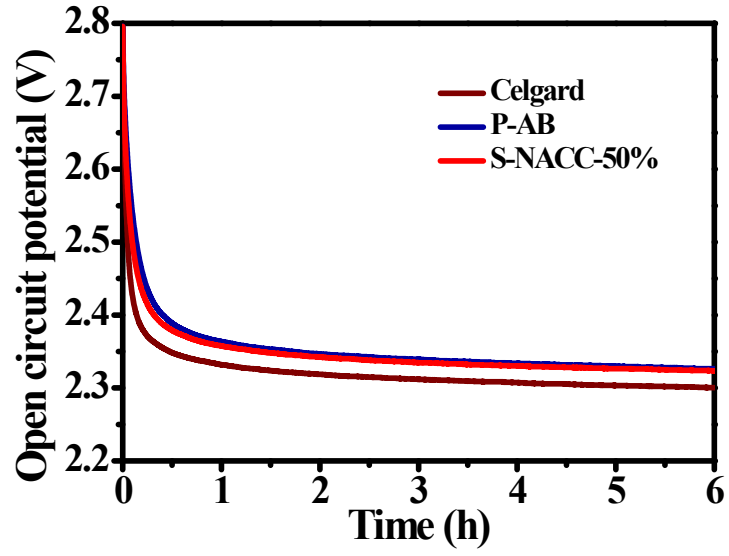

Fig.S7 Self-discharge behavior of Li-S batteries with different separators

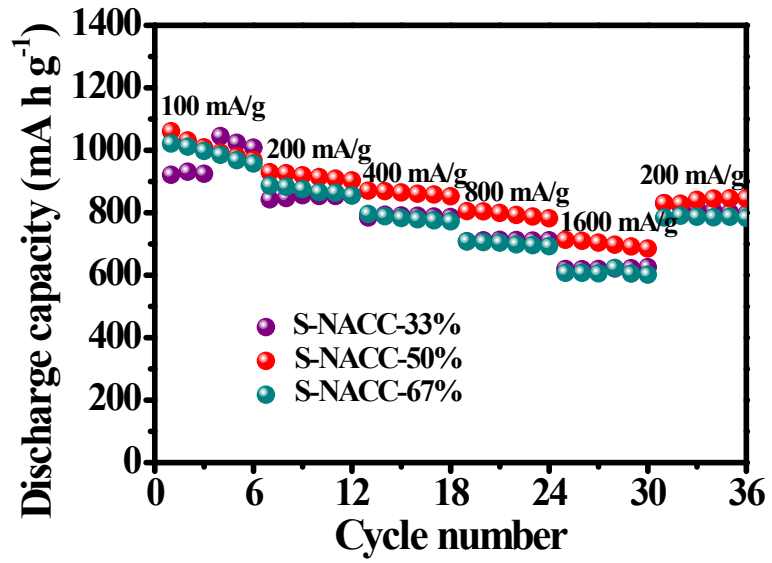

Fig.S8 The rate performance of different addition of NACC

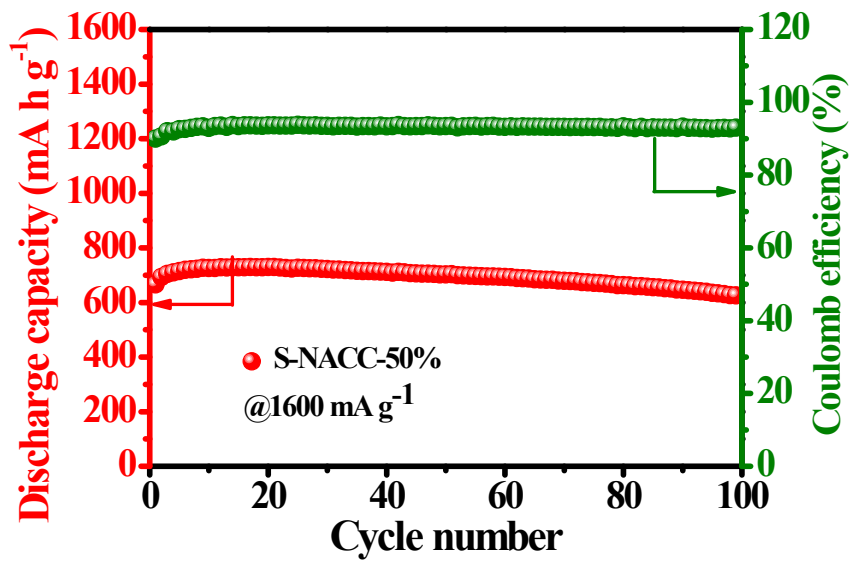

Fig.S9 the cycling performance of S-NACC-50% at 1600 mA g<sup>-1</sup>
